# Supplementary material for: Diverse RNA-Binding Proteins Interact with Functionally Related Sets of RNAs, Suggesting an Extensive Regulatory System
Source: PLoS Biol. 2008 Oct 28;6(10):e255. doi: 10.1371/journal.pbio.0060255 (PMC2573929; doi:10.1371/journal.pbio.0060255)
Supplement: Table S3 — (91 KB XLS) [file pbio.0060255.st003.xls]

## Sheet: Key
GO terms significantly enriched in RBP target sets (P-value from hypergeometric distribution with Bonferroni correction <= 0.001) compared to all mRNAs for which we obtained reliable measurements.
P = Process
C = Component
F = Function

## Sheet: Table_S3
Bfr1
P	cell organization and biogenesis	5.77e-23
P	ribonucleoprotein complex biogenesis and assembly	7.97e-20
P	cellular process	2.24e-19
P	ribosome biogenesis and assembly	5.31e-17
P	organelle organization and biogenesis	1.89e-10
P	rRNA metabolic process	1.4e-09
P	rRNA processing	1.54e-08
P	biopolymer metabolic process	1.58e-08
P	nucleocytoplasmic transport	6.75e-07
P	RNA metabolic process	2.21e-06
P	nuclear transport	5.09e-06
P	RNA localization	5.27e-05
P	RNA processing	5.72e-05
P	protein export from nucleus	0.000110723
P	protein import into nucleus	0.000162594
P	nuclear import	0.000162594
P	nuclear export	0.000187639
P	vesicle-mediated transport	0.000209001
P	35S primary transcript processing	0.000272835
P	macromolecule metabolic process	0.000283953
P	intracellular transport	0.000303187
P	cellular localization	0.000361306
P	nucleobase, nucleoside, nucleotide and nucleic acid metabolic process	0.000399806
P	metabolic process	0.000411618
P	rRNA export from nucleus	0.000416347
P	rRNA transport	0.000416347
P	nucleobase, nucleoside, nucleotide and nucleic acid transport	0.000933723
P	establishment of cellular localization	0.000960135
P	cellular metabolic process	0.00105463
P	mRNA-binding (hnRNP) protein import into nucleus	0.00133367
P	nucleic acid transport	0.00138793
P	RNA transport	0.00138793
P	establishment of RNA localization	0.00138793
P	localization	0.00218089
P	mRNA export from nucleus	0.00297271
P	mRNA transport	0.00297271
P	RNA export from nucleus	0.00310872
P	transport	0.00388208
P	nuclear pore organization and biogenesis	0.00659065
P	establishment of localization	0.0115644
P	snRNA export from nucleus	0.0129494
P	NLS-bearing substrate import into nucleus	0.0129494
P	snRNP protein import into nucleus	0.0129494
P	ribosomal protein import into nucleus	0.0129494
P	snRNA transport	0.0129494
P	tRNA metabolic process	0.0159634
P	tRNA export from nucleus	0.0192377
P	tRNA transport	0.0192377
P	processing of 20S pre-rRNA	0.0304709
C	cell part	6.36e-23
C	cell	7.89e-23
C	intracellular	2.62e-15
C	intracellular part	1.56e-14
C	nuclear lumen	8.02e-09
C	nucleolus	1.39e-08
C	nuclear part	1.34e-06
C	nuclear pore	0.000154598
C	pore complex	0.000154598
C	nuclear membrane	0.000396351
C	nuclear membrane part	0.000396351
C	membrane coat	0.00154938
C	coated membrane	0.00154938
C	endomembrane system	0.00191117
C	membrane-enclosed lumen	0.00243326
C	organelle lumen	0.00243326
C	nucleus	0.00248498
C	cytoplasmic vesicle part	0.0132876
C	vesicle coat	0.0168002
C	membrane-bound organelle	0.0211022
C	intracellular membrane-bound organelle	0.0211022
C	nuclear envelope	0.0226682
C	vesicle membrane	0.0296389
C	cytoplasmic vesicle membrane	0.0296389
C	coated vesicle membrane	0.0296389
C	vesicle	0.0387389
F	catalytic activity	3.39e-07
F	ATPase activity	2.33e-05
F	hydrolase activity	6.21e-05
F	snoRNA binding	6.25e-05
F	nucleoside-triphosphatase activity	0.000120277
F	pyrophosphatase activity	0.000884339
F	hydrolase activity, acting on acid anhydrides	0.000884339
F	hydrolase activity, acting on acid anhydrides, in phosphorus-containing anhydrides	0.000884339
F	translation initiation factor activity	0.00149838
F	binding	0.00202179
F	ATP-dependent RNA helicase activity	0.00632767
F	ATPase activity, coupled	0.0115351
F	RNA helicase activity	0.0122294
F	aminoacyl-tRNA ligase activity	0.0125617
F	ligase activity, forming carbon-oxygen bonds	0.0125617
F	ligase activity, forming aminoacyl-tRNA and related compounds	0.0125617
F	RNA-dependent ATPase activity	0.0134561
F	translation factor activity, nucleic acid binding	0.013705
F	RNA binding	0.0200033
Cbc2
C	protein complex	0.0067654
C	large ribosomal subunit	0.0109781
C	cytosolic large ribosomal subunit (sensu Eukaryota)	0.0147133
C	ribonucleoprotein complex	0.0151584
C	cytosolic ribosome (sensu Eukaryota)	0.0344388
C	cytosolic part	0.035909
F	small protein conjugating enzyme activity	2.69e-05
F	ubiquitin conjugating enzyme activity	0.00365169
F	structural constituent of ribosome	0.0239524
Cbf5
Gbp2
P	rRNA processing	1.61e-10
P	ribosome biogenesis and assembly	2.93e-10
P	rRNA metabolic process	8.31e-10
P	ribonucleoprotein complex biogenesis and assembly	1.99e-09
P	organelle organization and biogenesis	2.94e-08
P	RNA metabolic process	2.04e-07
P	nucleobase, nucleoside, nucleotide and nucleic acid metabolic process	4.56e-07
P	biopolymer metabolic process	8.28e-07
P	RNA processing	3.87e-06
P	macromolecule metabolic process	6.87e-06
P	cell organization and biogenesis	3.49e-05
P	chromosome organization and biogenesis (sensu Eukaryota)	0.000135536
P	chromosome organization and biogenesis	0.000177725
P	DNA packaging	0.000406726
P	establishment and/or maintenance of chromatin architecture	0.000406726
P	chromatin modification	0.00110089
P	chromatin remodeling	0.00145452
P	processing of 27S pre-rRNA	0.0114149
P	metabolic process	0.0313
P	cellular metabolic process	0.0319864
P	DNA metabolic process	0.04123
C	nuclear lumen	2.3e-16
C	nuclear part	9.73e-15
C	membrane-enclosed lumen	8.97e-13
C	organelle lumen	8.97e-13
C	nucleus	1.18e-12
C	nucleolus	2.73e-10
C	membrane-bound organelle	8.67e-06
C	intracellular membrane-bound organelle	8.67e-06
C	organelle part	0.000221041
C	intracellular organelle part	0.000221041
C	nucleoplasm part	0.000606004
C	intracellular organelle	0.000945758
C	organelle	0.000976872
C	chromatin remodeling complex	0.00102607
C	nucleoplasm	0.00223361
C	non-membrane-bound organelle	0.00265405
C	intracellular non-membrane-bound organelle	0.00265405
C	protein complex	0.00536988
C	cell part	0.0102238
C	cell	0.0106392
C	intracellular	0.0215603
C	small nucleolar ribonucleoprotein complex	0.025171
C	intracellular part	0.0443321
F	binding	0.0390287
Hrb1
C	eukaryotic translation initiation factor 3 complex	0.0406169
Khd1
P	biological regulation	2.83e-08
P	regulation of biological process	3.65e-07
P	regulation of cellular process	8.53e-06
P	transcription	1.42e-05
P	regulation of nucleobase, nucleoside, nucleotide and nucleic acid metabolic process	6.35e-05
P	cell morphogenesis	8.9e-05
P	anatomical structure morphogenesis	8.9e-05
P	anatomical structure development	8.9e-05
P	regulation of metabolic process	0.000209451
P	cell communication	0.000356544
P	regulation of cellular metabolic process	0.000560013
P	regulation of transcription from RNA polymerase II promoter	0.00162036
P	regulation of transcription	0.00168531
P	regulation of transcription, DNA-dependent	0.00168765
P	transcription from RNA polymerase II promoter	0.00182949
P	growth	0.00259246
P	signal transduction	0.00280844
P	regulation of cell size	0.00367112
P	regulation of biological quality	0.00367112
P	transcription, DNA-dependent	0.00570146
P	RNA biosynthetic process	0.00847996
P	cell division	0.0136498
P	cell growth	0.0185427
P	developmental process	0.0210218
C	cell wall	1.19e-19
C	cell wall (sensu Fungi)	1.19e-19
C	external encapsulating structure	1.19e-19
C	cell part	2.29e-05
C	cell	2.41e-05
C	site of polarized growth	3.19e-05
C	plasma membrane	0.000263082
C	bud	0.00065187
C	cortical cytoskeleton	0.00226999
C	cortical actin cytoskeleton	0.00226999
C	actin cortical patch	0.00935504
C	bud neck	0.0119945
C	bud tip	0.0438398
F	transcription regulator activity	3.54e-09
F	transcription factor activity	0.000386758
F	structural constituent of cell wall	0.00234708
F	DNA binding	0.00265899
F	transmembrane receptor activity	0.00274571
F	RNA polymerase II transcription factor activity	0.0139449
F	signal transducer activity	0.0243225
Msl5
Nab2
P	nucleobase, nucleoside, nucleotide and nucleic acid metabolic process	1.49e-11
P	RNA metabolic process	1.92e-08
P	biopolymer metabolic process	1.7e-07
P	transcription	1.51e-06
P	DNA metabolic process	2.03e-05
P	chromatin modification	3.32e-05
P	transcription, DNA-dependent	3.35e-05
P	DNA packaging	4.08e-05
P	establishment and/or maintenance of chromatin architecture	4.08e-05
P	biological regulation	5.35e-05
P	regulation of nucleobase, nucleoside, nucleotide and nucleic acid metabolic process	6.3e-05
P	RNA biosynthetic process	6.39e-05
P	regulation of biological process	0.000259506
P	regulation of transcription	0.000260718
P	macromolecule metabolic process	0.000272105
P	regulation of cellular process	0.00035547
P	regulation of transcription, DNA-dependent	0.0026523
P	transcription from RNA polymerase II promoter	0.0028486
P	regulation of metabolic process	0.00620397
P	regulation of cellular metabolic process	0.00653804
P	covalent chromatin modification	0.00712138
P	histone modification	0.00712138
P	chromosome organization and biogenesis	0.0096532
P	chromosome organization and biogenesis (sensu Eukaryota)	0.0207058
P	negative regulation of transcription	0.025462
P	negative regulation of transcription, DNA-dependent	0.030936
P	RNA processing	0.0329006
P	cell cycle process	0.0335169
C	nucleus	3.46e-18
C	nuclear part	2.36e-09
C	nuclear lumen	1.56e-08
C	membrane-bound organelle	4.69e-08
C	intracellular membrane-bound organelle	4.69e-08
C	membrane-enclosed lumen	2.49e-06
C	organelle lumen	2.49e-06
C	intracellular organelle	3.61e-06
C	organelle	3.87e-06
C	transcription factor complex	5.12e-06
C	nucleoplasm	1.34e-05
C	intracellular part	3.32e-05
C	intracellular	8.59e-05
C	histone acetyltransferase complex	0.000222031
C	nucleoplasm part	0.000648932
C	cell	0.0125759
C	cell part	0.0224366
C	nucleolus	0.0296239
C	NuA4 histone acetyltransferase complex	0.0325099
C	H4/H2A histone acetyltransferase complex	0.0325099
F	transcription regulator activity	1.28e-06
F	binding	0.017319
F	nucleic acid binding	0.0402796
F	RNA polymerase II transcription factor activity	0.0461965
Nab3
C	organellar ribosome	0.0376586
C	mitochondrial ribosome	0.0376586
F	transferase activity, transferring pentosyl groups	0.0049231
Nab6
P	asparagine catabolic process	1.56e-05
P	cellular response to nitrogen starvation	1.56e-05
P	cellular response to nitrogen levels	1.56e-05
P	asparagine metabolic process	0.000381763
P	aspartate family amino acid catabolic process	0.000631493
P	glutamine family amino acid catabolic process	0.000984895
P	response to extracellular stimulus	0.00291919
P	response to nutrient levels	0.00291919
P	cellular response to starvation	0.0108916
P	cellular response to extracellular stimulus	0.0108916
P	cellular response to nutrient levels	0.0108916
P	response to starvation	0.0108916
P	amino acid catabolic process	0.0241447
P	amine catabolic process	0.0339775
P	nitrogen compound catabolic process	0.0339775
C	cell wall	5.44e-09
C	cell wall (sensu Fungi)	5.44e-09
C	external encapsulating structure	5.44e-09
C	periplasmic space (sensu Fungi)	6.71e-05
C	periplasmic space	6.71e-05
C	extracellular region	0.0428954
F	asparaginase activity	8.87e-06
F	structural constituent of cell wall	0.0166271
F	hydrolase activity, acting on carbon-nitrogen (but not peptide) bonds, in linear amides	0.0460146
Nop56
P	telomere maintenance via recombination	5.82e-05
F	helicase activity	5.44e-06
F	DNA helicase activity	0.00140726
F	amino acid-polyamine transporter activity	0.0263682
F	transcription factor binding	0.0425263
Npl3
P	oxidative phosphorylation	3.36e-06
P	translation	0.000141848
P	nucleoside phosphate metabolic process	0.0170809
P	ATP biosynthetic process	0.0170809
P	energy coupled proton transport, down electrochemical gradient	0.0170809
P	ATP synthesis coupled proton transport	0.0170809
P	ATP metabolic process	0.0170809
P	nucleoside triphosphate metabolic process	0.0274649
P	nucleoside triphosphate biosynthetic process	0.0411753
C	organelle	6.48e-14
C	intracellular organelle	1.13e-13
C	mitochondrial part	2.54e-10
C	intracellular	6.61e-09
C	ribosome	1.35e-08
C	membrane-bound organelle	1.64e-08
C	intracellular membrane-bound organelle	1.64e-08
C	mitochondrial membrane part	1.95e-08
C	intracellular part	2.39e-08
C	organellar ribosome	2.43e-08
C	mitochondrial ribosome	2.43e-08
C	large ribosomal subunit	8.19e-08
C	ribonucleoprotein complex	1.25e-07
C	organelle part	1.39e-07
C	intracellular organelle part	1.39e-07
C	small ribosomal subunit	8.12e-05
C	organellar large ribosomal subunit	9e-05
C	mitochondrial large ribosomal subunit	9e-05
C	cytosolic ribosome (sensu Eukaryota)	9.29e-05
C	mitochondrial envelope	0.00012621
C	protein complex	0.000240662
C	cell part	0.000263355
C	cell	0.000294855
C	cytosolic part	0.000312626
C	mitochondrion	0.000620314
C	cytoplasm	0.000847639
C	mitochondrial matrix	0.000891547
C	mitochondrial lumen	0.000891547
C	organelle envelope	0.00150372
C	envelope	0.00150372
C	mitochondrial membrane	0.00197674
C	mitochondrial inner membrane	0.00245279
C	cytoplasmic part	0.00368591
C	organelle inner membrane	0.00482635
C	proton-transporting ATP synthase complex (sensu Eukaryota)	0.00662319
C	hydrogen-translocating F-type ATPase complex	0.00662319
C	proton-transporting ATP synthase complex	0.00662319
C	cytosolic large ribosomal subunit (sensu Eukaryota)	0.0213475
F	structural constituent of ribosome	4.71e-16
F	structural molecule activity	2.94e-08
Nrd1
C	organellar ribosome	0.000437898
C	mitochondrial ribosome	0.000437898
C	organellar small ribosomal subunit	0.045318
C	mitochondrial small ribosomal subunit	0.045318
Nsr1
P	translation	2.5e-08
P	macromolecule biosynthetic process	0.00687233
C	ribosome	4.46e-12
C	large ribosomal subunit	6.93e-11
C	cytosolic ribosome (sensu Eukaryota)	5.06e-10
C	cytosolic part	1.09e-09
C	ribonucleoprotein complex	5.19e-08
C	organellar ribosome	8.94e-06
C	mitochondrial ribosome	8.94e-06
C	small ribosomal subunit	9.03e-06
C	organelle part	1.02e-05
C	intracellular organelle part	1.02e-05
C	cytosolic large ribosomal subunit (sensu Eukaryota)	1.23e-05
C	mitochondrial part	1.63e-05
C	cytosol	2.32e-05
C	organelle	3.43e-05
C	intracellular organelle	5.78e-05
C	protein complex	0.000114499
C	non-membrane-bound organelle	0.000433555
C	intracellular non-membrane-bound organelle	0.000433555
C	organellar large ribosomal subunit	0.000510324
C	mitochondrial large ribosomal subunit	0.000510324
C	cytoplasm	0.000585372
C	intracellular	0.000674076
C	intracellular part	0.00163095
C	cytosolic small ribosomal subunit (sensu Eukaryota)	0.00165454
C	eukaryotic 48S initiation complex	0.00165454
C	mitochondrial envelope	0.00778058
C	eukaryotic 43S preinitiation complex	0.0195097
F	structural constituent of ribosome	2.5e-19
F	structural molecule activity	7.32e-14
Pab1
P	translation	1.84e-26
P	macromolecule biosynthetic process	1.24e-13
P	cellular biosynthetic process	1.13e-10
P	biosynthetic process	1.61e-09
P	protein metabolic process	0.00393127
P	oxidative phosphorylation	0.00502008
P	cellular protein metabolic process	0.0152777
P	cellular macromolecule metabolic process	0.0410706
C	cytosolic ribosome (sensu Eukaryota)	6e-47
C	cytosolic part	1.54e-40
C	ribosome	3.12e-37
C	large ribosomal subunit	3.88e-33
C	cytosolic large ribosomal subunit (sensu Eukaryota)	1.49e-30
C	ribonucleoprotein complex	8.44e-27
C	cytosol	1.31e-19
C	cytosolic small ribosomal subunit (sensu Eukaryota)	1.57e-17
C	eukaryotic 48S initiation complex	1.57e-17
C	small ribosomal subunit	4.82e-17
C	cytoplasmic part	2.62e-14
C	eukaryotic 43S preinitiation complex	4.14e-14
C	protein complex	2.29e-12
C	cytoplasm	1.94e-11
C	mitochondrial part	2.06e-11
C	organelle part	3.74e-10
C	intracellular organelle part	3.74e-10
C	non-membrane-bound organelle	1.33e-08
C	intracellular non-membrane-bound organelle	1.33e-08
C	organelle	2.16e-08
C	intracellular organelle	2.93e-08
C	mitochondrial envelope	1.09e-06
C	organellar ribosome	1.14e-06
C	mitochondrial ribosome	1.14e-06
C	membrane part	6.73e-06
C	mitochondrial membrane part	0.00014862
C	mitochondrial membrane	0.0004188
C	organellar large ribosomal subunit	0.000496051
C	mitochondrial large ribosomal subunit	0.000496051
C	organelle envelope	0.000510059
C	envelope	0.000510059
C	organelle membrane	0.00110904
C	endoplasmic reticulum	0.00181622
C	mitochondrion	0.00251731
C	mitochondrial matrix	0.00369414
C	mitochondrial lumen	0.00369414
C	cell part	0.00392843
C	cell	0.00453747
C	mitochondrial inner membrane	0.00673029
C	mitochondrial intermembrane space	0.00692716
C	organelle envelope lumen	0.00692716
C	organelle inner membrane	0.00800514
C	intracellular	0.0147411
C	intracellular part	0.0172771
C	proton-transporting ATP synthase complex, coupling factor F(o) (sensu Eukaryota)	0.0314999
C	respiratory chain complex IV (sensu Eukaryota)	0.0314999
C	proton-transporting ATP synthase complex, coupling factor F(o)	0.0314999
C	respiratory chain complex IV	0.0314999
C	proton-transporting ATP synthase complex (sensu Eukaryota)	0.0319408
C	hydrogen-translocating F-type ATPase complex	0.0319408
C	proton-transporting ATP synthase complex	0.0319408
C	nucleolar part	0.0414362
F	structural constituent of ribosome	2.73e-56
F	structural molecule activity	8.02e-33
F	hydrogen ion transporter activity	0.0108038
F	monovalent inorganic cation transporter activity	0.0183157
F	peroxidase activity	0.0268375
F	oxidoreductase activity, acting on peroxide as acceptor	0.0268375
F	cytochrome-c oxidase activity	0.0398244
F	heme-copper terminal oxidase activity	0.0398244
F	oxidoreductase activity, acting on heme group of donors	0.0398244
F	oxidoreductase activity, acting on heme group of donors, oxygen as acceptor	0.0398244
Pin4
Pub1
P	cellular lipid metabolic process	6.2e-07
P	lipid metabolic process	8.56e-07
P	ATP synthesis coupled electron transport	1.81e-05
P	ATP synthesis coupled electron transport (sensu Eukaryota)	1.81e-05
P	amine transport	4.85e-05
P	ion transport	0.000156294
P	membrane lipid biosynthetic process	0.00017725
P	electron transport	0.000226778
P	oxidative phosphorylation	0.000315102
P	membrane lipid metabolic process	0.000395442
P	glycerophospholipid metabolic process	0.000468307
P	lipid biosynthetic process	0.00165965
P	cation transport	0.00256585
P	phosphoinositide metabolic process	0.0039112
P	phosphoinositide biosynthetic process	0.00400874
P	phospholipid biosynthetic process	0.00413059
P	glycerophospholipid biosynthetic process	0.00414767
P	protein amino acid glycosylation	0.00606122
P	biopolymer glycosylation	0.00606122
P	phospholipid metabolic process	0.0096866
P	GPI anchor metabolic process	0.0102102
P	GPI anchor biosynthetic process	0.0102102
P	amino acid transport	0.01076
P	organic acid transport	0.0180796
P	glycoprotein biosynthetic process	0.019952
P	protein amino acid N-linked glycosylation	0.0205986
P	protein amino acid lipidation	0.0236985
P	lipoprotein metabolic process	0.0236985
P	lipoprotein biosynthetic process	0.0236985
P	glycoprotein metabolic process	0.0304303
P	carboxylic acid transport	0.0394929
P	transport	0.048638
C	membrane	5.06e-21
C	endoplasmic reticulum	2.26e-14
C	membrane part	5.56e-11
C	plasma membrane	3.28e-10
C	vacuole	7.25e-09
C	intrinsic to membrane	2.72e-08
C	integral to membrane	4.84e-08
C	cytoplasmic part	5.57e-08
C	organelle membrane	1.13e-06
C	storage vacuole	1.24e-06
C	lytic vacuole	1.24e-06
C	vacuole (sensu Fungi)	1.24e-06
C	mitochondrial electron transport chain	3.02e-05
C	nuclear envelope-endoplasmic reticulum network	5.58e-05
C	endoplasmic reticulum membrane	7.92e-05
C	cell wall	0.000303466
C	cell wall (sensu Fungi)	0.000303466
C	external encapsulating structure	0.000303466
C	endoplasmic reticulum part	0.000419744
C	intrinsic to organelle membrane	0.00096901
C	integral to organelle membrane	0.00113253
C	vacuolar part	0.00233124
C	plasma membrane part	0.00489388
C	integral to plasma membrane	0.00767391
C	intrinsic to plasma membrane	0.00831447
C	mitochondrial membrane part	0.00853176
C	vacuolar membrane	0.017515
C	cytoplasm	0.0469826
F	transporter activity	5.55e-17
F	ion transporter activity	1.12e-11
F	cation transporter activity	4.4e-09
F	electrochemical potential-driven transporter activity	5.45e-06
F	porter activity	5.45e-06
F	amine transporter activity	5.74e-06
F	carrier activity	1.45e-05
F	polyamine transporter activity	0.000111448
F	metal ion transporter activity	0.00177385
F	amino acid transporter activity	0.00195407
F	transferase activity, transferring glycosyl groups	0.00343604
F	monovalent inorganic cation transporter activity	0.00365919
F	organic acid transporter activity	0.00466121
F	transition metal ion transporter activity	0.00524499
F	transferase activity, transferring hexosyl groups	0.00627901
F	di-, tri-valent inorganic cation transporter activity	0.00972009
F	hydrogen ion transporter activity	0.0100408
F	carboxylic acid transporter activity	0.0114209
F	drug transporter activity	0.0325512
F	amino acid-polyamine transporter activity	0.0448003
Puf1
P	establishment of localization	0.000868723
P	localization	0.00183331
P	protein import into nucleus	0.00195973
P	nuclear import	0.00195973
P	transport	0.00243854
P	polyamine transport	0.0259682
P	nuclear transport	0.0379435
C	plasma membrane	0.000449921
C	nuclear pore	0.0110307
C	pore complex	0.0110307
C	nuclear membrane	0.0268647
C	nuclear membrane part	0.0268647
F	spermine transporter activity	0.000466392
Puf2
C	plasma membrane	2.55e-06
C	cell part	2.77e-05
C	cell	2.84e-05
F	transcription regulator activity	0.000529319
F	spermine transporter activity	0.0139594
Puf3
P	translation	3.54e-40
P	macromolecule biosynthetic process	8.85e-29
P	protein metabolic process	4.82e-22
P	cellular protein metabolic process	1.95e-20
P	cellular biosynthetic process	3.03e-20
P	cellular macromolecule metabolic process	6.15e-19
P	biosynthetic process	2.65e-18
P	aerobic respiration	1.71e-10
P	cellular respiration	5.08e-10
P	macromolecule metabolic process	5.06e-08
P	mitochondrial transport	4.33e-06
P	protein import into mitochondrion	1.38e-05
P	protein targeting to mitochondrion	2.75e-05
P	cellular metabolic process	4.94e-05
P	metabolic process	7.79e-05
P	protein import into mitochondrial matrix	0.000198781
P	tRNA aminoacylation for protein translation	0.000241662
P	amino acid activation	0.000241662
P	tRNA aminoacylation	0.000241662
P	energy derivation by oxidation of organic compounds	0.00106711
P	cellular process	0.00227821
P	generation of precursor metabolites and energy	0.00376801
P	mitochondrion organization and biogenesis	0.00569463
P	protein import	0.00766579
P	protein complex assembly	0.0122409
P	heme a biosynthetic process	0.0201501
P	heme a metabolic process	0.0201501
P	cytochrome c oxidase complex assembly	0.0436335
C	mitochondrion	3.61e-90
C	mitochondrial part	6.35e-71
C	organellar ribosome	4.63e-64
C	mitochondrial ribosome	4.63e-64
C	mitochondrial matrix	3.67e-62
C	mitochondrial lumen	3.67e-62
C	cytoplasmic part	5.16e-38
C	organellar large ribosomal subunit	3.43e-34
C	mitochondrial large ribosomal subunit	3.43e-34
C	membrane-bound organelle	6.98e-26
C	intracellular membrane-bound organelle	6.98e-26
C	organellar small ribosomal subunit	7.31e-26
C	mitochondrial small ribosomal subunit	7.31e-26
C	cytoplasm	8.57e-24
C	membrane-enclosed lumen	1.16e-23
C	organelle lumen	1.16e-23
C	ribosome	2.07e-22
C	intracellular organelle	3.48e-19
C	organelle	3.63e-19
C	large ribosomal subunit	3.35e-16
C	mitochondrial envelope	9.67e-15
C	ribonucleoprotein complex	1.06e-13
C	intracellular part	4.36e-13
C	intracellular	1.75e-12
C	organelle part	1.99e-12
C	intracellular organelle part	1.99e-12
C	small ribosomal subunit	4.01e-12
C	organelle envelope	6.32e-12
C	envelope	6.32e-12
C	mitochondrial membrane	6.79e-11
C	mitochondrial inner membrane	1.36e-10
C	organelle inner membrane	6.68e-10
C	cell part	5.69e-08
C	cell	5.88e-08
C	non-membrane-bound organelle	8.75e-05
C	intracellular non-membrane-bound organelle	8.75e-05
C	mitochondrial inner membrane presequence translocase complex	0.00224108
C	mitochondrial membrane part	0.00447024
C	protein complex	0.0053075
C	mitochondrial intermembrane space	0.00543562
C	organelle envelope lumen	0.00543562
F	structural constituent of ribosome	9.84e-32
F	structural molecule activity	5.78e-23
F	aminoacyl-tRNA ligase activity	4.21e-06
F	ligase activity, forming carbon-oxygen bonds	4.21e-06
F	ligase activity, forming aminoacyl-tRNA and related compounds	4.21e-06
F	protein transporter activity	0.000169786
F	ligase activity	0.015035
Puf4
P	ribosome biogenesis and assembly	1.66e-33
P	ribonucleoprotein complex biogenesis and assembly	6.76e-32
P	organelle organization and biogenesis	2.18e-18
P	rRNA processing	1.94e-17
P	rRNA metabolic process	1.8e-16
P	cell organization and biogenesis	1.58e-14
P	nucleobase, nucleoside, nucleotide and nucleic acid metabolic process	2.54e-12
P	cellular process	5.93e-12
P	RNA processing	8.87e-12
P	macromolecule metabolic process	3.56e-11
P	RNA metabolic process	3.59e-11
P	ribosomal large subunit biogenesis and assembly	4.15e-10
P	metabolic process	7.15e-08
P	biopolymer metabolic process	1.35e-07
P	ribosome assembly	3.97e-07
P	cellular metabolic process	2.48e-06
P	protein-RNA complex assembly	7.22e-06
P	35S primary transcript processing	1.26e-05
P	ribosomal subunit assembly	0.00213294
P	processing of 27S pre-rRNA	0.00273723
P	transcription from RNA polymerase I promoter	0.0044722
P	ribosomal large subunit assembly and maintenance	0.0100457
P	processing of 20S pre-rRNA	0.0187264
P	chromatin assembly or disassembly	0.038731
C	nucleolus	1.2e-25
C	non-membrane-bound organelle	7.07e-19
C	intracellular non-membrane-bound organelle	7.07e-19
C	nuclear lumen	6.61e-17
C	membrane-enclosed lumen	5.9e-14
C	organelle lumen	5.9e-14
C	nuclear part	1.7e-13
C	cell part	1.53e-11
C	cell	1.59e-11
C	nucleolar part	2.37e-11
C	nucleus	1.79e-09
C	organelle part	4.9e-09
C	intracellular organelle part	4.9e-09
C	intracellular	2.68e-08
C	intracellular part	7.98e-08
C	intracellular organelle	2.23e-07
C	organelle	2.3e-07
C	nucleosome	4.37e-07
C	nuclear nucleosome	4.37e-07
C	ribonucleoprotein complex	2.86e-05
C	DNA-directed RNA polymerase I complex	7.35e-05
C	membrane-bound organelle	0.000181447
C	intracellular membrane-bound organelle	0.000181447
C	small nucleolar ribonucleoprotein complex	0.000189867
C	protein complex	0.00049055
C	cytosolic ribosome (sensu Eukaryota)	0.00265065
C	DNA-directed RNA polymerase complex	0.00368377
C	RNA polymerase complex	0.00368377
C	cytosolic large ribosomal subunit (sensu Eukaryota)	0.00431081
C	cytosolic part	0.00453501
C	nuclear chromatin	0.00549434
C	chromatin	0.00987051
C	DNA-directed RNA polymerase II, core complex	0.0120875
F	nucleic acid binding	3.05e-07
F	RNA binding	2.09e-05
F	rRNA binding	0.00845568
F	DNA-directed RNA polymerase activity	0.00891015
F	binding	0.0118309
Puf5
P	DNA packaging	3.92e-07
P	establishment and/or maintenance of chromatin architecture	3.92e-07
P	chromatin assembly or disassembly	0.000159946
P	DNA metabolic process	0.000233993
P	chromatin remodeling	0.000313293
P	chromatin modification	0.000836356
P	negative regulation of transcription from RNA polymerase II promoter	0.00124624
P	negative regulation of transcription, DNA-dependent	0.00370018
P	negative regulation of transcription	0.00591481
P	cell organization and biogenesis	0.00957768
P	transcription, DNA-dependent	0.0121234
P	RNA biosynthetic process	0.0150902
P	regulation of transcription, DNA-dependent	0.0155279
P	nucleobase, nucleoside, nucleotide and nucleic acid metabolic process	0.0205274
P	negative regulation of nucleobase, nucleoside, nucleotide and nucleic acid metabolic process	0.0212362
P	regulation of nucleobase, nucleoside, nucleotide and nucleic acid metabolic process	0.0216924
P	transcription	0.0319248
P	organelle organization and biogenesis	0.0359643
P	negative regulation of metabolic process	0.049352
P	regulation of transcription	0.0494867
C	nucleosome	1.08e-07
C	nuclear nucleosome	1.08e-07
C	nuclear part	1.25e-05
C	nuclear chromatin	1.27e-05
C	chromatin	2.77e-05
C	nuclear chromosome	3.32e-05
C	nucleus	0.000218443
C	chromosome	0.00027766
C	nuclear chromosome part	0.000825347
C	chromosomal part	0.00547783
C	spindle	0.00942493
C	microtubule organizing center part	0.0125071
C	organelle part	0.0132867
C	intracellular organelle part	0.0132867
C	nucleoplasm part	0.0176418
C	cytoskeletal part	0.018012
C	transcription factor complex	0.0328669
C	nucleoplasm	0.0430346
C	cytoskeleton	0.0447608
F	helicase activity	0.000285902
F	nucleic acid binding	0.00183595
F	transcription regulator activity	0.00386626
F	DNA binding	0.00422436
F	binding	0.00868697
F	transcription coactivator activity	0.0238176
F	transcriptional activator activity	0.0431936
Scp160
P	cellular process	9.29e-23
P	cell organization and biogenesis	2.38e-13
P	ribonucleoprotein complex biogenesis and assembly	2.21e-07
P	ribosome biogenesis and assembly	5.21e-07
P	protein import into nucleus	1.78e-06
P	nuclear import	1.78e-06
P	localization	6.58e-06
P	transport	1.07e-05
P	lipid metabolic process	2.38e-05
P	establishment of localization	5.9e-05
P	mRNA-binding (hnRNP) protein import into nucleus	9.61e-05
P	primary metabolic process	0.000133008
P	nucleocytoplasmic transport	0.000180149
P	protein export from nucleus	0.00024204
P	rRNA processing	0.000362467
P	biopolymer metabolic process	0.000392564
P	cellular lipid metabolic process	0.000644473
P	nuclear transport	0.000702286
P	snRNA export from nucleus	0.000818584
P	NLS-bearing substrate import into nucleus	0.000818584
P	snRNP protein import into nucleus	0.000818584
P	ribosomal protein import into nucleus	0.000818584
P	snRNA transport	0.000818584
P	nuclear pore organization and biogenesis	0.000880819
P	organelle organization and biogenesis	0.00113892
P	metabolic process	0.00115
P	rRNA metabolic process	0.00218876
P	rRNA export from nucleus	0.00239655
P	rRNA transport	0.00239655
P	cell wall organization and biogenesis	0.00317406
P	external encapsulating structure organization and biogenesis	0.00317406
P	cellular metabolic process	0.00423788
P	protein transport	0.0106335
P	35S primary transcript processing	0.0122061
P	intracellular protein transport	0.0130886
P	protein localization	0.0152895
P	tRNA export from nucleus	0.0155182
P	tRNA transport	0.0155182
P	protein import	0.0187814
P	establishment of protein localization	0.0236845
P	nuclear export	0.043003
P	protein targeting	0.0451006
P	protein amino acid glycosylation	0.0482073
P	biopolymer glycosylation	0.0482073
C	cell part	1.29e-24
C	cell	1.68e-24
C	cell wall	2.95e-07
C	cell wall (sensu Fungi)	2.95e-07
C	external encapsulating structure	2.95e-07
C	intracellular part	1.37e-06
C	intracellular	2.74e-06
C	plasma membrane	1.52e-05
C	nuclear pore	4.97e-05
C	pore complex	4.97e-05
C	nuclear membrane	0.000373883
C	nuclear membrane part	0.000373883
C	membrane	0.00061855
C	endomembrane system	0.000702087
C	nucleolus	0.00119301
C	endoplasmic reticulum	0.00178616
C	cell cortex part	0.00743584
C	nuclear lumen	0.00835732
C	intrinsic to plasma membrane	0.0139367
C	site of polarized growth	0.0156189
C	cell cortex	0.0192956
F	catalytic activity	9.6e-13
F	ATPase activity	2.11e-08
F	hydrolase activity	8.88e-07
F	ATPase activity, coupled	1.51e-06
F	ligase activity	1.52e-05
F	nucleoside-triphosphatase activity	3.29e-05
F	pyrophosphatase activity	0.000301963
F	hydrolase activity, acting on acid anhydrides	0.000301963
F	hydrolase activity, acting on acid anhydrides, in phosphorus-containing anhydrides	0.000301963
F	snoRNA binding	0.000461827
F	aminoacyl-tRNA ligase activity	0.00285827
F	ligase activity, forming carbon-oxygen bonds	0.00285827
F	ligase activity, forming aminoacyl-tRNA and related compounds	0.00285827
F	RNA helicase activity	0.00775862
F	binding	0.01066
F	transferase activity, transferring hexosyl groups	0.0155431
She2
C	bud	1.08e-09
F	transmembrane receptor activity	0.0319351
Ski2
P	mRNA catabolic process	0.0451053
F	translation repressor activity	0.00061189
Ssd1
P	re-entry into mitotic cell cycle	0.0395881
P	re-entry into mitotic cell cycle after pheromone arrest	0.0395881
C	cell wall	9.99e-13
C	cell wall (sensu Fungi)	9.99e-13
C	external encapsulating structure	9.99e-13
C	extracellular region	0.0020994
C	site of polarized growth	0.00898661
F	hydrolase activity, hydrolyzing O-glycosyl compounds	2.53e-05
F	hydrolase activity, acting on glycosyl bonds	6.31e-05
F	glucosidase activity	7.26e-05
Tdh3
Vts1
P	carbohydrate transport	0.00129025
P	glucan biosynthetic process	0.00211645
P	glycogen biosynthetic process	0.0155065
F	carbohydrate transporter activity	1.24e-05
F	helicase activity	0.000270754
F	fructose transporter activity	0.000671686
F	glucose transporter activity	0.000671686
F	monosaccharide transporter activity	0.000671686
F	hexose transporter activity	0.000671686
F	mannose transporter activity	0.000671686
F	sugar transporter activity	0.0014641
F	UDP-glucosyltransferase activity	0.0111362
F	glucosyltransferase activity	0.0111362
Yll032c
F	acid phosphatase activity	1.78e-05
F	phosphoric monoester hydrolase activity	0.0162588
F	phosphoric ester hydrolase activity	0.0278576
Ypl184c
P	cell wall organization and biogenesis	0.00708037
P	external encapsulating structure organization and biogenesis	0.00708037
P	cellular response to starvation	0.0129051
P	cellular response to extracellular stimulus	0.0129051
P	cellular response to nutrient levels	0.0129051
P	response to starvation	0.0129051
P	cell communication	0.0155091
C	cell wall	1.96e-24
C	cell wall (sensu Fungi)	1.96e-24
C	external encapsulating structure	1.96e-24
C	endoplasmic reticulum	1.61e-06
C	extracellular region	0.000448067
C	plasma membrane	0.000520436
C	periplasmic space (sensu Fungi)	0.0165209
C	periplasmic space	0.0165209
F	hydrolase activity, hydrolyzing O-glycosyl compounds	0.00122088
F	structural constituent of cell wall	0.00248164
F	polyamine transporter activity	0.00248164
F	hydrolase activity, acting on glycosyl bonds	0.00539101
F	amine transporter activity	0.00748099
F	amino acid-polyamine transporter activity	0.0215461
F	glucosidase activity	0.0221157
F	electrochemical potential-driven transporter activity	0.0386271
F	porter activity	0.0386271
F	carboxylic acid transporter activity	0.0485028
